# Supplementary material
Source: publisher figshare collection journal article supplement (https://acs.figshare.com/ndownloader/files/19666517)
Supplement: Supplementary file 1 [file 19666517]

## Supporting Information

### Endoplasmic reticulum targeting ratiometric fluorescent probe for carboxylesterase

#### 2 detection in drug-induced acute liver injury

Xiangge Tian,<sup>†, #</sup> Fei Yan,<sup>†, ‡, #</sup> Jingyuan Zheng,<sup>†, #</sup> Xiaolin Cui,<sup>†</sup> Lei Feng,<sup>†, \*</sup> Sheng Li,<sup>†</sup> LingLing Jin,<sup>†</sup> Tony D. James<sup>§, \*</sup> and Xiaochi Ma<sup>†, ‡, \*</sup>

[<sup>†</sup>] Academy of Integrative Medicine, National-Local Joint Engineering Research Center for Drug-Research and Development (R&D) of Neurodegenerative Diseases, College of Pharmacy, Dalian Medical University, Lvshun South Road No 9, Dalian 116044, China;

[<sup>‡</sup>] Jiangsu Key Laboratory of New Drug Research and Clinical Pharmacy, Xuzhou Medical University, 209 Tongshan Road, Xuzhou, 221004, Jiangsu, China;

[<sup>§</sup>] Department of Chemistry, University of Bath, Bath, BA2 7AY, UK.

\* Corresponding authors.

Email: maxc1978@163.com (X. Ma), leifeng@mail.dlut.edu.cn (L. Feng), and t.d.james@bath.ac.uk (T. D. James)

<sup>#</sup> These authors contributed equally to this work.

## Table of Contents

|                                                                                                                |            |
|----------------------------------------------------------------------------------------------------------------|------------|
| <b>Figure S1.</b> Synthesis pathway for <b>ERNB</b> .....                                                      | <b>S3</b>  |
| <b>Figure S2.</b> <sup>1</sup> H NMR (400 MHz, DMSO- <i>d</i> <sub>6</sub> ) spectrum of <b>ERNH</b> .....     | <b>S3</b>  |
| <b>Figure S3.</b> <sup>13</sup> C NMR (100 MHz, DMSO- <i>d</i> <sub>6</sub> ) spectrum of <b>ERNH</b> .....    | <b>S4</b>  |
| <b>Figure S4.</b> HSQC (DMSO- <i>d</i> <sub>6</sub> ) spectrum of <b>ERNH</b> .....                            | <b>S4</b>  |
| <b>Figure S5.</b> HRMS of <b>ERNH</b> .....                                                                    | <b>S5</b>  |
| <b>Figure S6.</b> <sup>1</sup> H NMR (400 MHz, DMSO- <i>d</i> <sub>6</sub> ) spectrum of <b>ERNB</b> .....     | <b>S5</b>  |
| <b>Figure S7.</b> <sup>13</sup> C NMR (100 MHz, DMSO- <i>d</i> <sub>6</sub> ) spectrum of <b>ERNB</b> .....    | <b>S6</b>  |
| <b>Figure S8.</b> HSQC (DMSO- <i>d</i> <sub>6</sub> ) spectrum of <b>ERNB</b> .....                            | <b>S6</b>  |
| <b>Figure S9.</b> HRMS of <b>ERNB</b> .....                                                                    | <b>S7</b>  |
| <b>Figure S10.</b> The Absorption and Emission spectral of <b>ERNB</b> , <b>ERNH</b> and incubated sample..... | <b>S7</b>  |
| <b>Figure S11.</b> The HPLC analysis of <b>ERNB</b> after incubated with CES2.....                             | <b>S7</b>  |
| <b>Figure S12.</b> Cytotoxicity assay of <b>ERNB</b> in HepG2 cells.....                                       | <b>S8</b>  |
| <b>Figure S13.</b> The fluorescence background of HepG2 cells.....                                             | <b>S8</b>  |
| <b>Figure S14.</b> The fluorescence imaging of CES2 in HepG2 tissues.....                                      | <b>S8</b>  |
| <b>Figure S15.</b> The colocalization of <b>ERNB</b> with Mito tracker.....                                    | <b>S9</b>  |
| <b>Figure S16.</b> The colocalization of <b>ERNB</b> with Lys tracker.....                                     | <b>S9</b>  |
| <b>Figure S17.</b> The fluorescence imaging of CES2 under tunicamycin induced ER stress.....                   | <b>S10</b> |
| <b>Figure S18.</b> Hematoxylin-Eosin staining of liver for control and APAP-induced liver.....                 | <b>S10</b> |

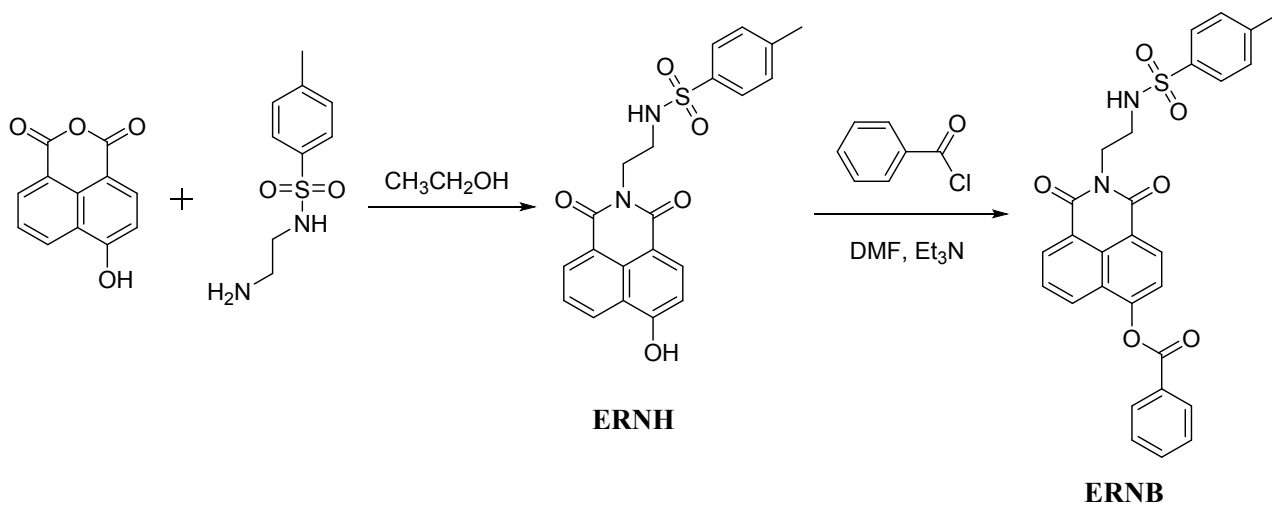

**Figure S1.** The synthetic route for **ERNB**.

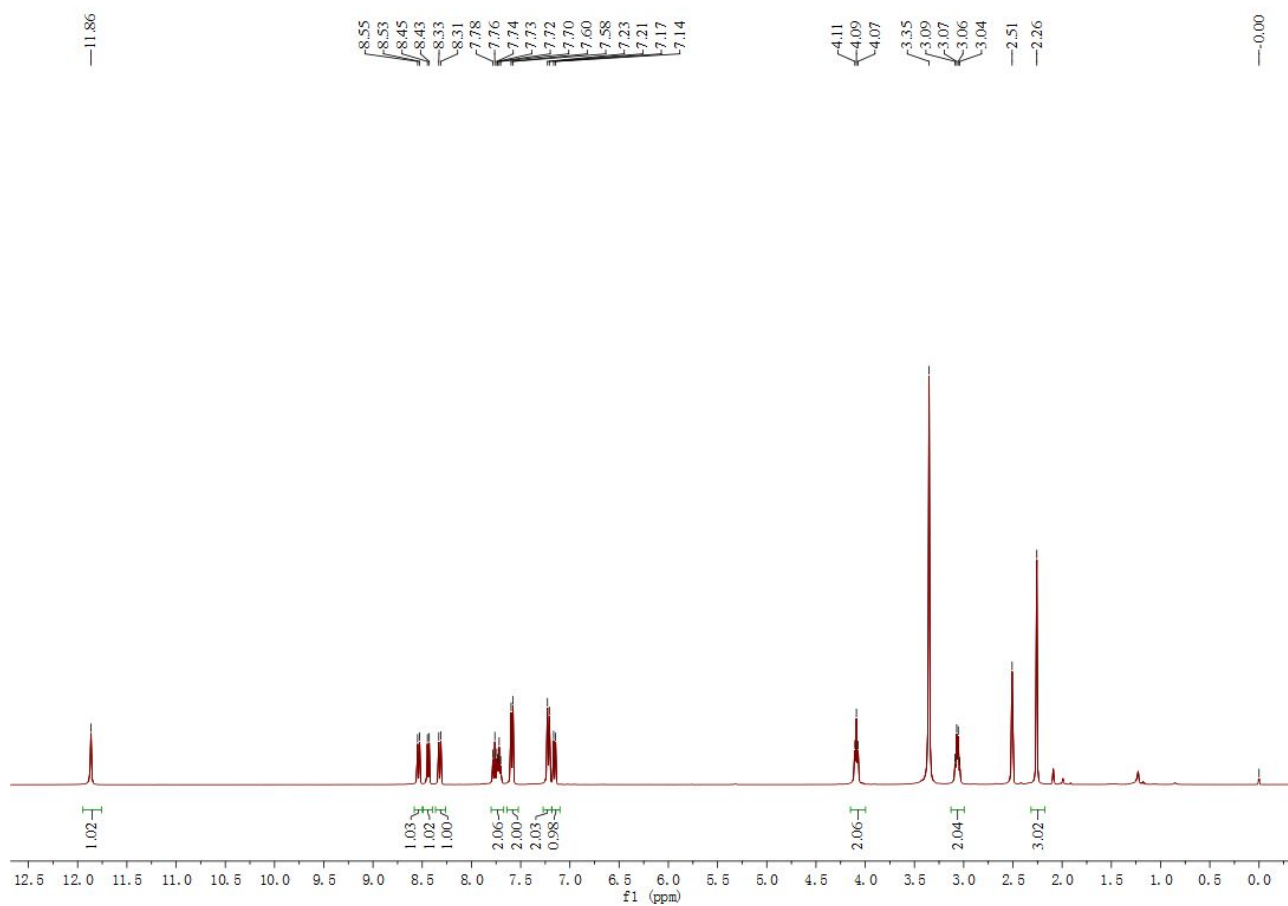

**Figure S2.**  $^1\text{H}$  NMR (400 MHz,  $\text{DMSO}-d_6$ ) spectrum of **ERNH**.

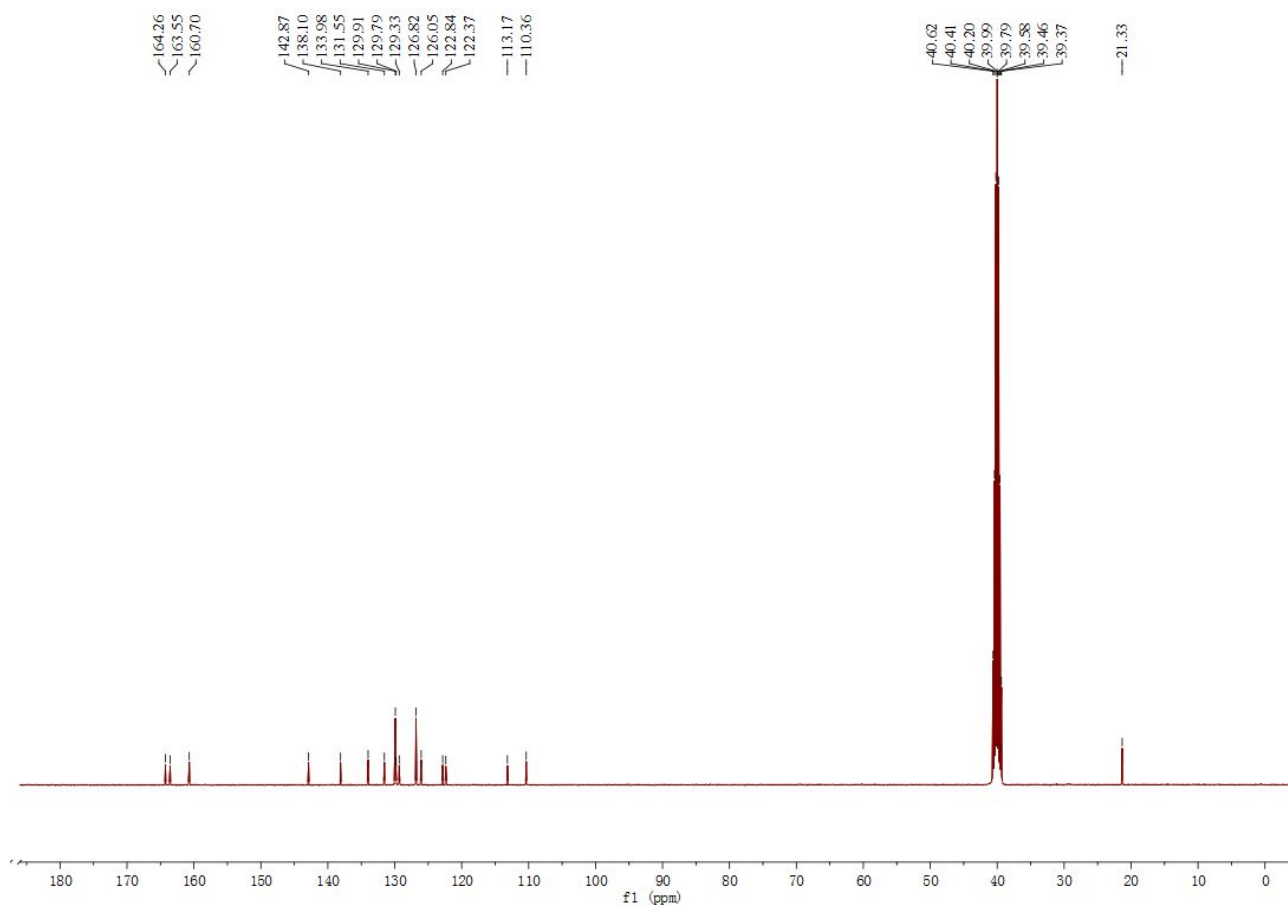

**Figure S3.**  $^{13}\text{C}$  NMR (100 MHz,  $\text{DMSO-}d_6$ ) spectrum of **ERNH**

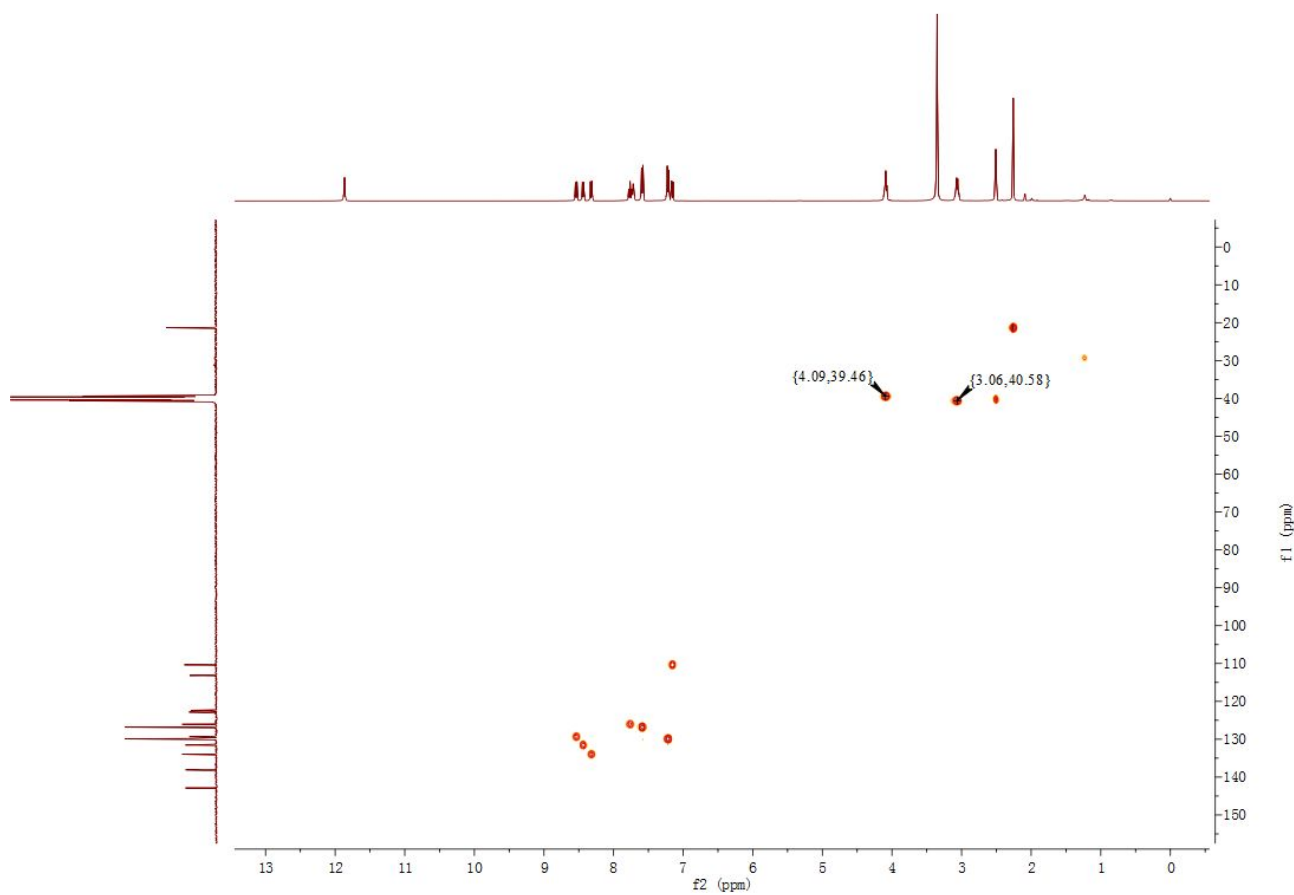

**Figure S4.** HSQC ( $\text{DMSO-}d_6$ ) spectrum of **ERNH**.

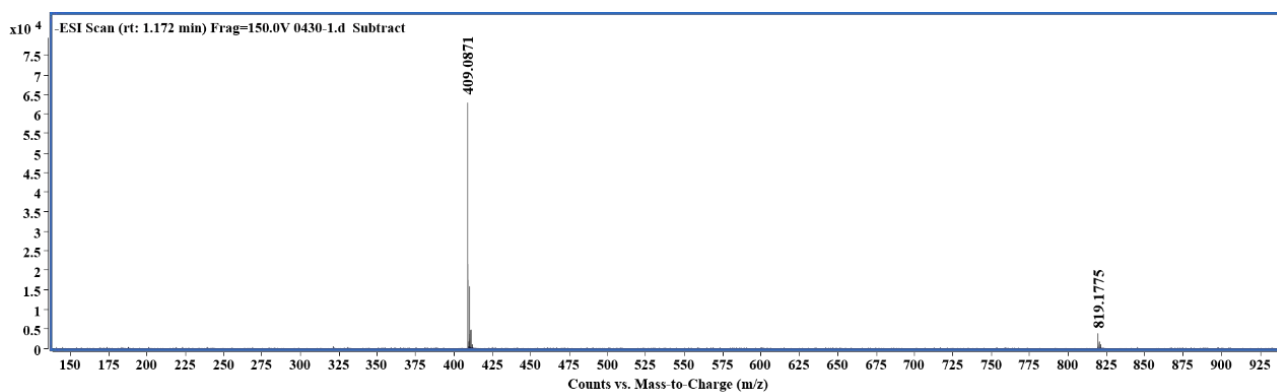

**Figure S5.** HRMS of ERNH.

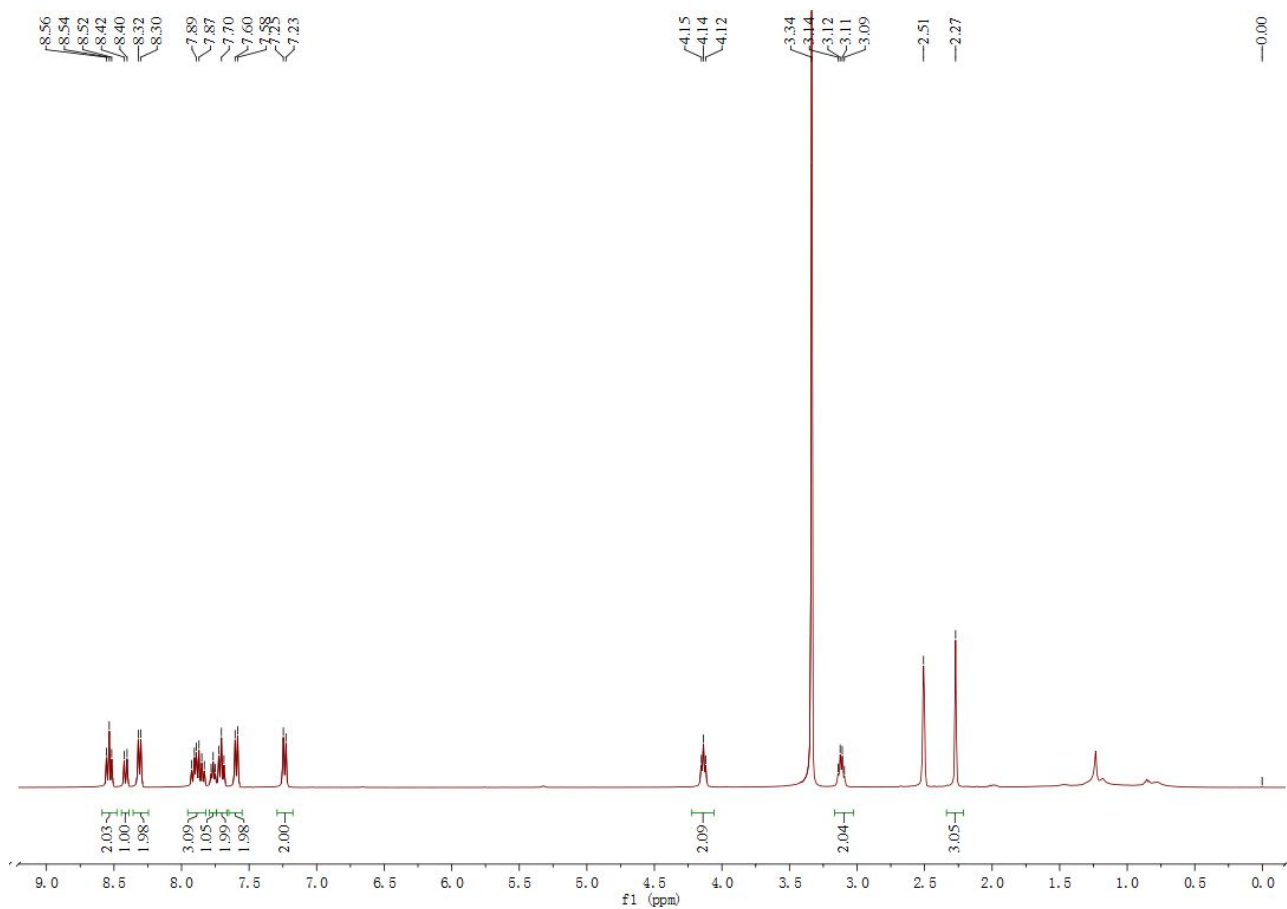

**FigureS6.** <sup>1</sup>H NMR (400 MHz, DMSO-*d*<sub>6</sub>) spectrum of ERNB.

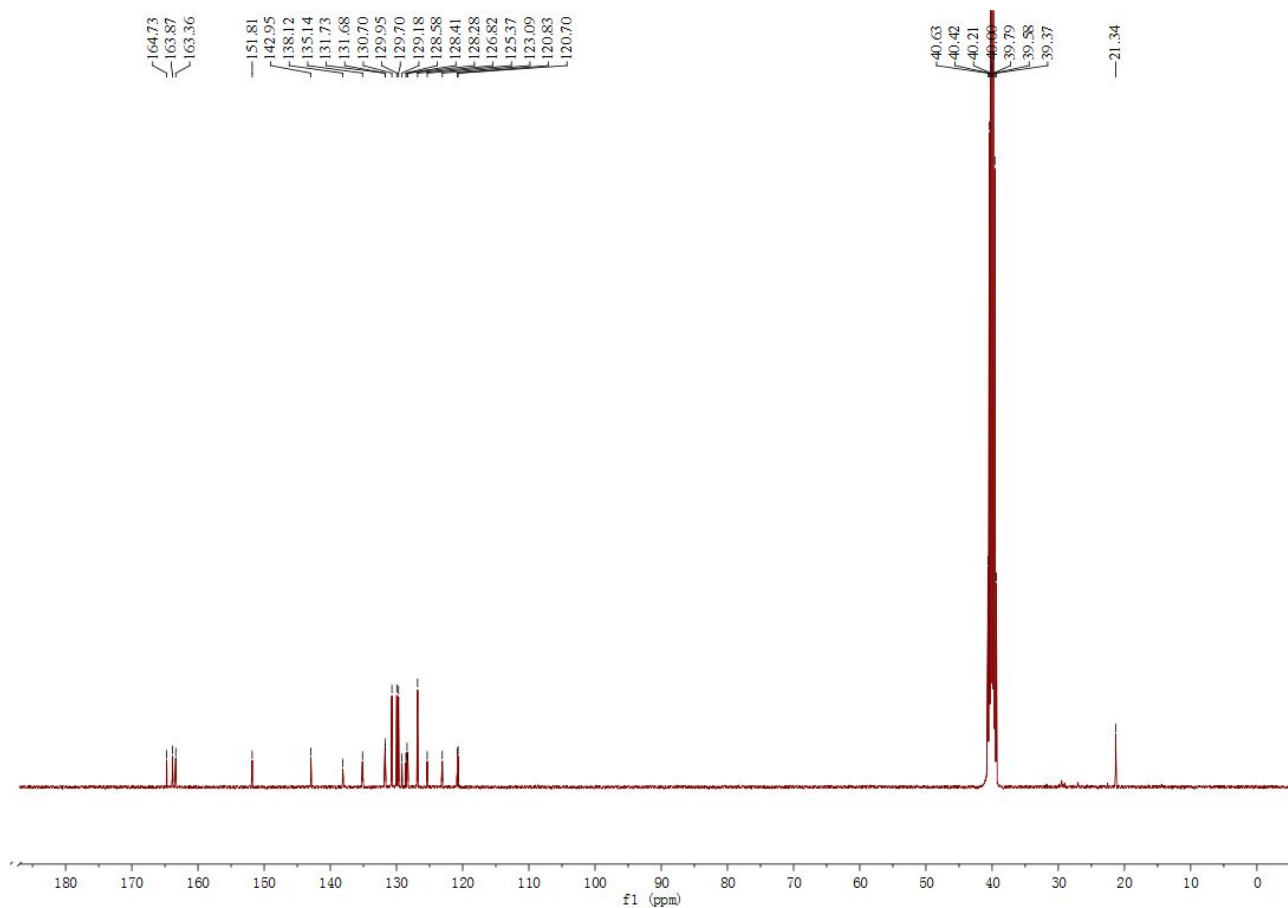

**FigureS7.**  $^{13}\text{C}$  NMR (100 MHz,  $\text{DMSO}-d_6$ ) spectrum of **ERNB**.

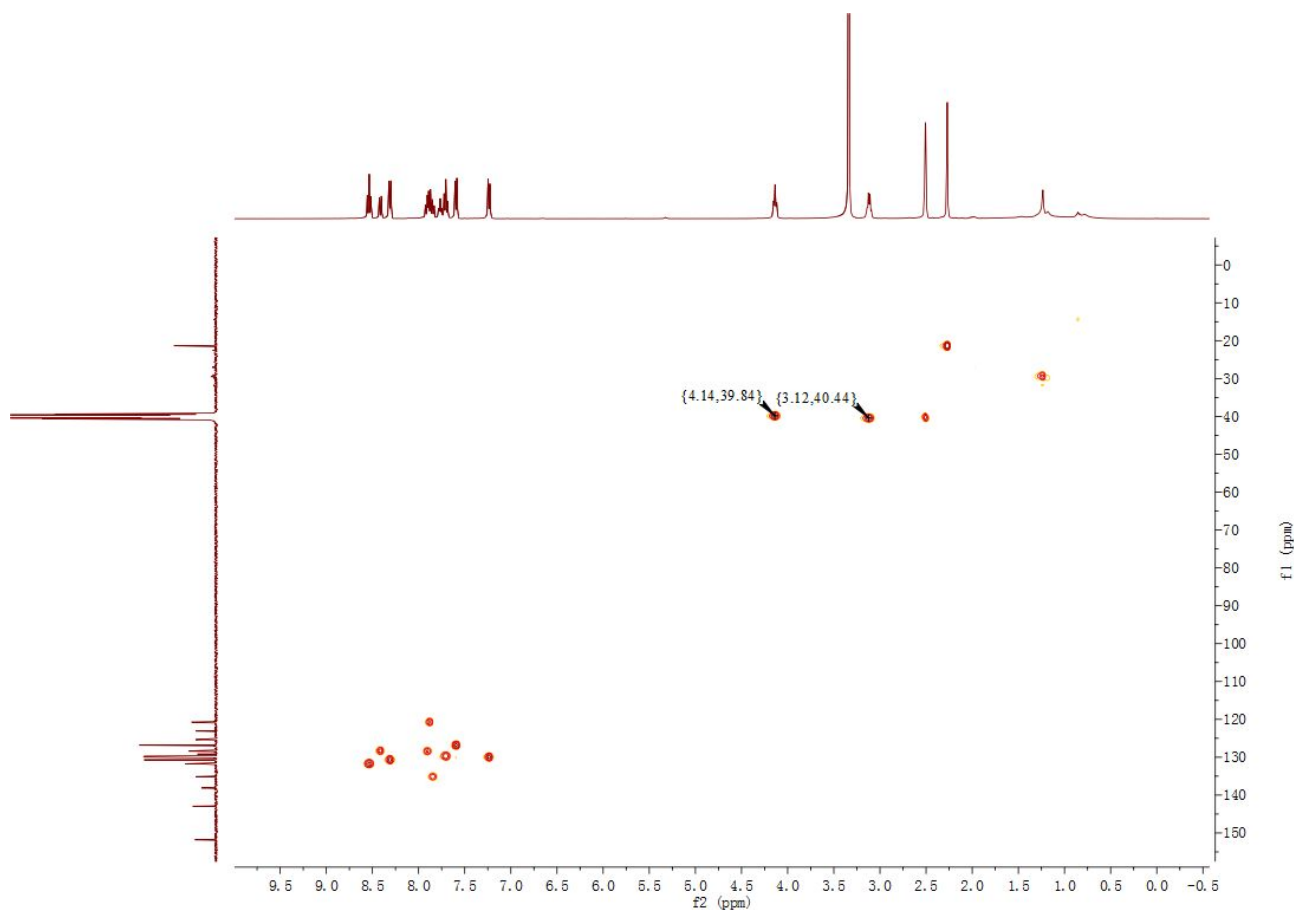

**Figure S8.** HSQC ( $\text{DMSO}-d_6$ ) spectrum of **ERNB**.

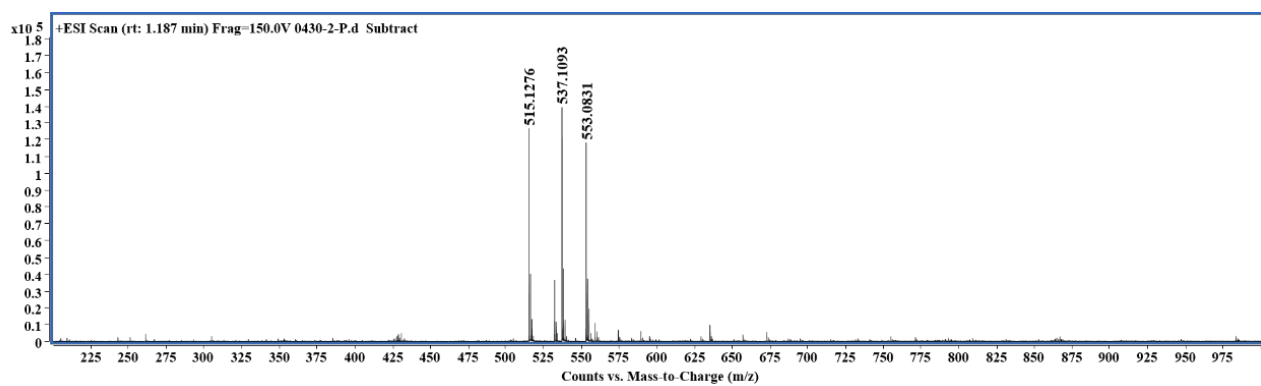

**Figure S9.** HRMS of ERNB.

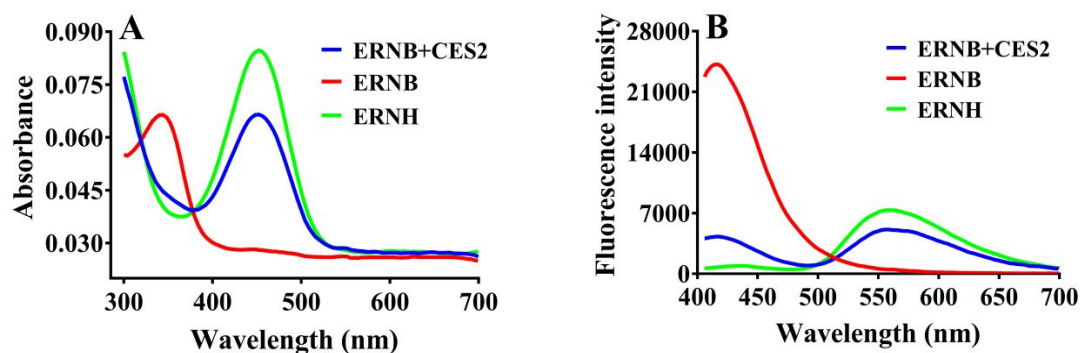

**Figure S10.** The absorption (A) and emission (B) spectral of **ERNB** (substrate), **ERNH** (metabolite) and the sample of **ERNB** incubated with CES2.

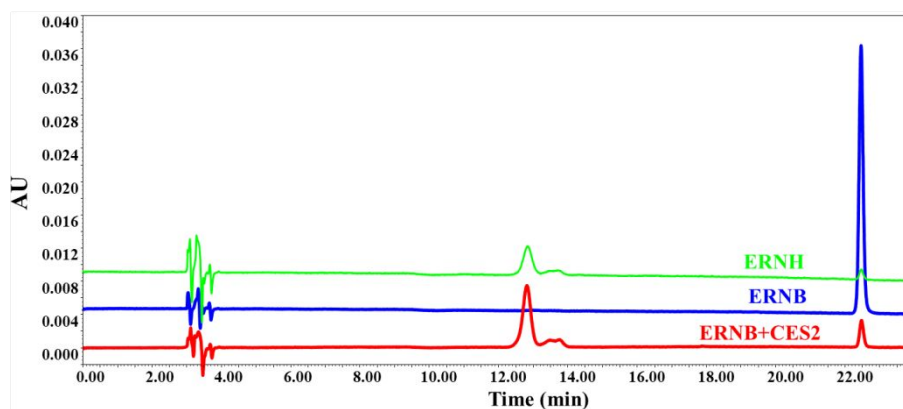

**Figure S11.** HPLC analysis of **ERNB**, the metabolite **ERNH** and the incubation sample of **ERNB**+CES2.

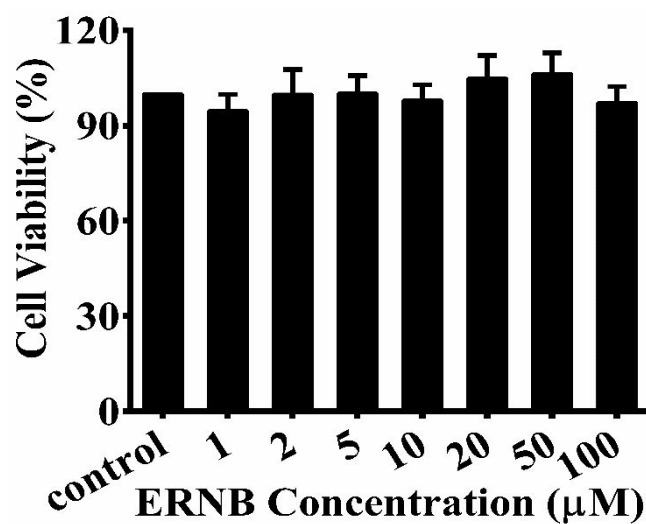

**Figure S12.** Cytotoxicity assay of ERNB in HepG2 cells.

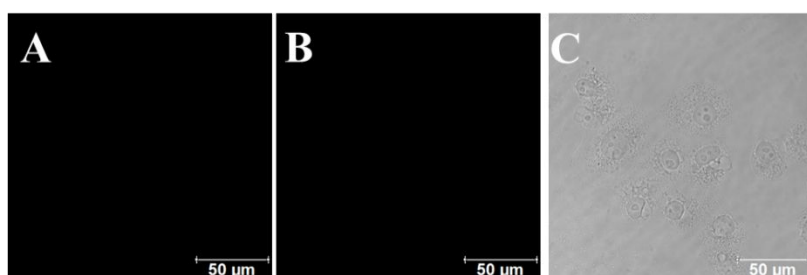

**Figure S13.** Different fluorescence imaging channel (A: blue, B: Green) and bright fields of HepG2 cells (C). Scale bars 50 μm.

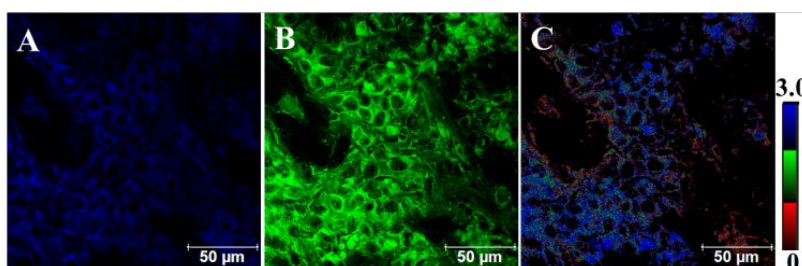

**Figure S14** (A, B) The fluorescence imaging of CES2 in HepG2 tissues at different channel (Blue:425 – 475 nm; Green: 535 – 585 nm) after incubated with **ERNB** (50 μM); (C) the average  $F_{\text{green}}/F_{\text{blue}}$  intensity ratios in the images. Data points represent the mean value of triplicate experiments for samples that were incubated at 37 °C for 1 h. Scale bars 50 μm.

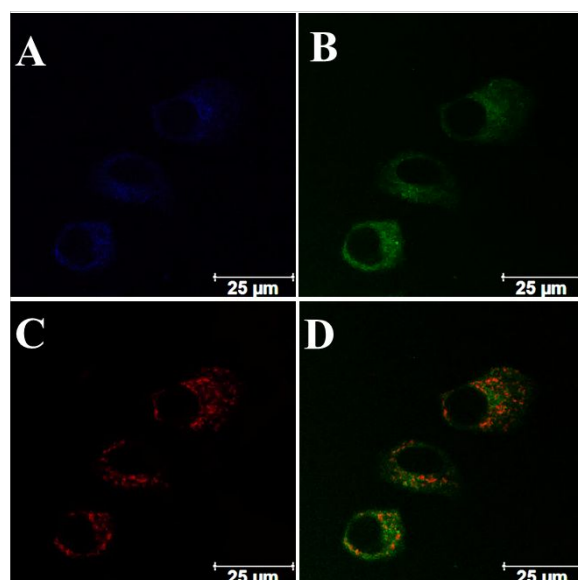

**Figure S15.** (A) Fluorescence images of of **ERNB** at the blue channel (425 – 475 nm); (B) fluorescence images of **ERNB** at the green channel (535 – 585 nm); (C) Mitochondria-Tracker; (D) merged fluorescence image of the green channel and Mitochondria-Tracker channel (red). Scale bars 25 μm.

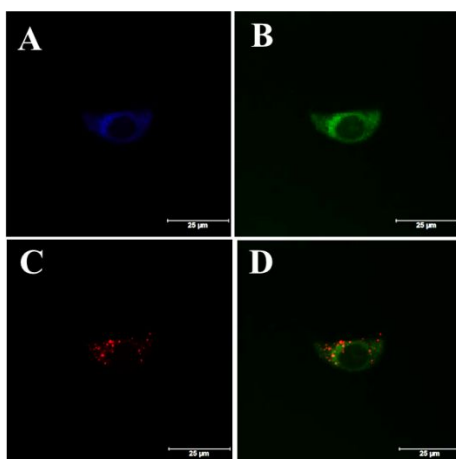

**Figure S16.** (A) Fluorescence images of of **ERNB** at the blue channel (425– 475 nm); (B) fluorescence images of of **ERNB** at the green channel (535 – 585 nm); (C) Lysosomes-Tracker; (D) merged fluorescence image of the green channel and Lysosomes -Tracker channel (red). Scale bars 25 μm.

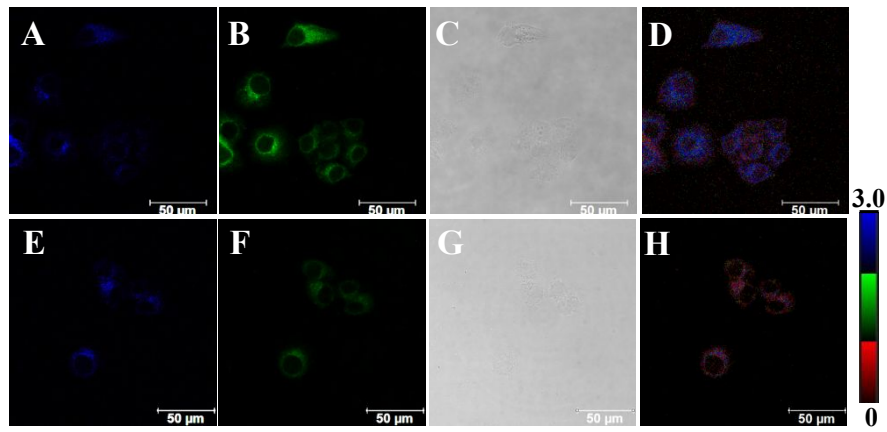

**Figure S17** (A, B) The fluorescence imaging of HepG2 cell after incubating with **ERNB** at 37 °C for 1 h; (E,F) the imaging of CES2 after induced by tunicamycin (20 μg/mL) for 5 h; (C, G) the bright field of HepG2 cells; (D, H) the average  $F_{\text{green}}/F_{\text{blue}}$  intensity ratios in the images. Scale bar is 50 μm.

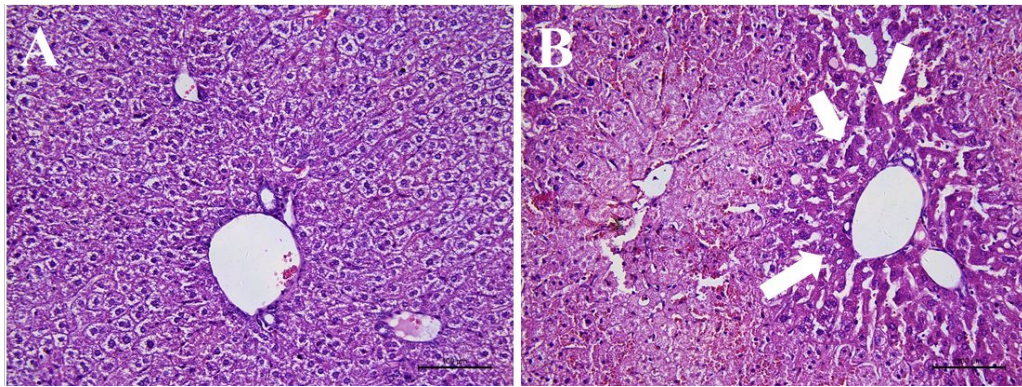

**Figure S18.** The Hematoxylin-Eosin staining of paraffin section for liver tissues in normal (A) and (B) APAP-induced acute liver injury group. Scale bar is 100 μm.
